# Supplementary material
Source: ML conference proceedings conference paper supplement (https://openreview.net/forum?id=Auy2DmlJBO)
Supplement: supplementary_material [file appendix B.pdf › supply/appendix B.pdf]

## L Further Related Work

In this section, we delve deeper into the related work on (medical) time series foundation models. Current research efforts in universal forecasting with time series foundation models can be broadly classified into four categories, as summarized in Table 13:

(i) **Encoder-only models.** Moirai is trained on the LOTSA dataset comprising 27B time points, with model sizes up to 311M parameters [23]. MOMENT, based on the T5 architecture, is pretrained on the Time-series Pile dataset containing approximately 1B time points, reaching up to 385M parameters [78].

(ii) **Encoder-decoder models,** exemplified by Chronos [28], which tokenizes time series data via scaling and quantization, training on both public and synthetic datasets, offers pre-trained models at multiple scales, with the largest containing up to 710M parameters.

(iii) **Decoder-only models.** TimesFM is trained on a corpus of 100B time points, with model sizes up to 500M parameters [25]. Lag-Llama focuses on univariate probabilistic forecasting, utilizing a decoder-only Transformer architecture with up to 200M parameters [81]. Timer is a generative pre-trained Transformer model designed for large-scale time series modeling, with a base version containing 84M parameters and pre-trained on 260B time points [80].

(iv) **Mixture-of-Experts architectures.** Recent models adopt sparse Mixture-of-Experts (MoE) architectures to enhance scalability and efficiency. Time-MoE [24] scales to 2.4B parameters with only a few experts activated per input, while Moirai-MoE [26] achieves token-level specialization without frequency heuristics, improving adaptability and inference cost.

Table 13: Comparison between time series models.

| Method           | MIRA<br>(Ours) | Sundial<br>(2025) | Time-MoE<br>(2024) | Moirai-MoE<br>(2024) | Moirai<br>(2024) | TimesFM<br>(2024) | Moment<br>(2024) | Chronos<br>(2024) | Timer<br>(2024) | Lag-Llama<br>(2023) | TimeGPT<br>(2023) |
|------------------|----------------|-------------------|--------------------|----------------------|------------------|-------------------|------------------|-------------------|-----------------|---------------------|-------------------|
| Architecture     | Decoder        | Decoder           | Decoder            | Decoder              | Encoder          | Decoder           | Encoder          | EncDec            | Decoder         | Decoder             | EncDec            |
| (Max) Model Size | 2.4B           | 444M              | 2.4B               | 1.1B                 | 311M             | 500M              | 385M             | 710M              | 67M             | 200M                | Unknown           |
| Input Token      | Point          | Patch             | Point              | Patch                | Patch            | Patch             | Patch            | Point             | Patch           | Point               | Patch             |
| Dataset Scale    | 454B           | 1TB               | 309B               | 27B                  | 27B/231B*        | 100B              | 1.13B            | 84B               | 29B             | 0.36B               | 100B              |
| Max Length       | 512            | 2880              | 4096               | 5000                 | 5000             | 512               | 512              | 512               | 1440            | 1024                | Unknown           |
| FFN              | Sparse         | Dense             | Sparse             | Sparse               | Dense            | Dense             | Dense            | Dense             | Dense           | Dense               | Dense             |

\* Depend on the way of calculation according to the original paper.

## M Downstream Datasets Statistics

Table 14: Characteristics of the WHO FluNet Dataset.

| Dataset                                   | Time Points | Missing Rate | Frequency         | Irregular Sampling | Signal Type                                                                                              |
|-------------------------------------------|-------------|--------------|-------------------|--------------------|----------------------------------------------------------------------------------------------------------|
| WHO FluNet                                | 5.27M       | 61.52%       | Weekly            |                    | Case Counts                                                                                              |
| CINC 2012                                 | 5.28M       | 0%           | Variable-specific | ✓                  | ECG, Blood Pressure (ABP/NIBP),<br>Respiration Rate, SpO <sub>2</sub> ,<br>Laboratory Measurements, etc. |
| MIT-BIH                                   | 31.1M       | 0%           | 360 Hz            |                    | ECG                                                                                                      |
| CinC 2019                                 | 39.5M       | 68.28%       | Hourly            | ✓                  | Heart Rate, Respiration Rate,<br>Temperature, Blood Pressure                                             |
| Johns Hopkins COVID-19 Dataset            | 3.81M       | 0%           | Daily             |                    | Case Counts, Death Counts                                                                                |
| CDC-Influenza Hospitalizations Admissions | 3.07M       | 27.1%        | Weekly            |                    | Hospitalized Case Counts                                                                                 |

## N Further Baseline Result

Table 15: Zero-shot forecasting performance on out-of-distribution datasets. Reported values are predicted by zero-shot forecasting model pre-trained on general corpora.

| Models                            |      | Lag-llama |       | TimeGPT |       | Timer |       | Moment <sub>small</sub> |       | Moment <sub>base</sub> |       | Moment <sub>large</sub> |       | Moirai-MoE <sub>small</sub> |       | Moirai-MoE <sub>base</sub> |       |
|-----------------------------------|------|-----------|-------|---------|-------|-------|-------|-------------------------|-------|------------------------|-------|-------------------------|-------|-----------------------------|-------|----------------------------|-------|
|                                   |      | RMSE      | MAE   | RMSE    | MAE   | RMSE  | MAE   | RMSE                    | MAE   | RMSE                   | MAE   | RMSE                    | MAE   | RMSE                        | MAE   | RMSE                       | MAE   |
| Heart Rate<br>(10 <sup>-1</sup> ) | 24   | 1.643     | 1.385 | 1.668   | 1.463 | 1.899 | 1.769 | 3.231                   | 2.035 | 3.218                  | 2.025 | 3.204                   | 2.019 | 1.443                       | 1.137 | 1.636                      | 1.321 |
|                                   | 32   | 1.702     | 1.433 | 2.090   | 1.755 | 1.898 | 1.721 | 2.985                   | 1.849 | 2.978                  | 1.857 | 2.949                   | 1.479 | 1.777                       | 1.432 | 1.942                      | 1.595 |
|                                   | 48   | 1.813     | 1.528 | 2.592   | 2.198 | 1.898 | 1.667 | 2.787                   | 1.738 | 2.764                  | 1.726 | 2.734                   | 1.711 | 2.374                       | 1.927 | 2.523                      | 2.095 |
|                                   | 64   | 1.895     | 1.605 | 2.683   | 2.245 | 1.907 | 1.657 | 2.861                   | 1.784 | 2.796                  | 1.732 | 2.781                   | 1.731 | 2.347                       | 1.906 | 2.476                      | 1.595 |
|                                   | Avg. | 1.764     | 1.488 | 2.258   | 1.915 | 1.901 | 1.704 | 2.966                   | 1.852 | 2.939                  | 1.835 | 2.917                   | 1.735 | 1.833                       | 1.844 | 2.013                      | 1.651 |
| MIT-BIH                           | 24   | 0.162     | 0.132 | 0.138   | 0.118 | 0.179 | 0.161 | 0.453                   | 0.258 | 0.451                  | 0.257 | 0.450                   | 0.256 | 0.165                       | 0.135 | 0.165                      | 0.135 |
|                                   | 32   | 0.185     | 0.148 | 0.175   | 0.141 | 0.219 | 0.184 | 0.407                   | 0.216 | 0.405                  | 0.214 | 0.402                   | 0.211 | 0.185                       | 0.152 | 0.185                      | 0.151 |
|                                   | 48   | 0.253     | 0.192 | 0.291   | 0.227 | 0.330 | 0.278 | 0.407                   | 0.224 | 0.406                  | 0.223 | 0.402                   | 0.218 | 0.231                       | 0.183 | 0.231                      | 0.183 |
|                                   | 64   | 0.268     | 0.203 | 0.321   | 0.256 | 0.292 | 0.230 | 0.401                   | 0.216 | 0.402                  | 0.217 | 0.396                   | 0.210 | 0.252                       | 0.198 | 0.253                      | 0.198 |
|                                   | Avg. | 0.217     | 0.169 | 0.231   | 0.185 | 0.255 | 0.213 | 0.417                   | 0.229 | 0.416                  | 0.228 | 0.413                   | 0.224 | 0.197                       | 0.159 | 0.197                      | 0.159 |
| CDC-IHA<br>(10 <sup>1</sup> )     | 12   | 6.354     | 4.725 | 6.314   | 4.671 | 6.235 | 4.996 | 15.864                  | 5.280 | 15.925                 | 5.289 | 15.765                  | 5.227 | 6.943                       | 5.591 | 8.613                      | 6.640 |
|                                   | 18   | 5.193     | 3.968 | 5.208   | 3.989 | 4.908 | 3.727 | 12.884                  | 4.435 | 12.941                 | 4.404 | 12.894                  | 4.416 | 5.751                       | 4.600 | 5.868                      | 4.731 |
|                                   | 24   | 7.643     | 5.528 | 7.886   | 5.535 | 7.670 | 5.601 | 22.026                  | 5.921 | 21.651                 | 5.934 | 21.735                  | 5.887 | 7.852                       | 5.715 | 8.167                      | 6.077 |
|                                   | 30   | 6.935     | 5.162 | 7.206   | 5.245 | 6.881 | 5.104 | 20.436                  | 5.593 | 20.008                 | 5.524 | 20.363                  | 5.511 | 7.852                       | 5.715 | 7.906                      | 6.001 |
|                                   | Avg. | 6.531     | 4.846 | 6.641   | 4.853 | 6.411 | 4.849 | 17.803                  | 5.307 | 17.631                 | 5.288 | 17.689                  | 5.260 | 6.792                       | 5.324 | 7.666                      | 5.862 |
| JH COVID-19<br>(10 <sup>2</sup> ) | 7    | 2.115     | 0.825 | 0.160   | 0.156 | 3.141 | 3.141 | 2.667                   | 0.404 | 2.662                  | 0.403 | 2.672                   | 0.404 | 0.467                       | 0.356 | 0.487                      | 0.357 |
|                                   | 14   | 3.052     | 1.214 | 0.990   | 0.817 | 2.268 | 2.135 | 3.795                   | 0.642 | 3.826                  | 0.644 | 3.811                   | 0.641 | 0.547                       | 0.396 | 0.522                      | 0.389 |
|                                   | 28   | 3.874     | 1.588 | 1.279   | 0.892 | 2.415 | 2.118 | 4.096                   | 0.786 | 4.143                  | 0.795 | 4.048                   | 0.779 | 0.924                       | 0.661 | 0.916                      | 0.674 |
|                                   | 90   | 5.342     | 2.101 | 5.087   | 4.459 | 2.765 | 1.917 | 1.749                   | 0.378 | 1.756                  | 0.377 | 1.724                   | 0.373 | 3.871                       | 1.486 | 75.64                      | 11.34 |
|                                   | Avg. | 3.596     | 1.432 | 1.879   | 1.580 | 2.647 | 2.328 | 3.077                   | 0.553 | 3.097                  | 0.554 | 3.064                   | 0.549 | 1.452                       | 0.725 | 19.391                     | 3.190 |
| ILI                               | 24   | 1.385     | 0.989 | 0.904   | 0.507 | 1.246 | 1.174 | 1.548                   | 0.989 | 1.545                  | 0.992 | 1.547                   | 0.989 | 1.634                       | 1.385 | 1.583                      | 1.349 |
|                                   | 36   | 1.702     | 1.321 | 2.729   | 1.582 | 2.316 | 1.751 | 1.467                   | 0.988 | 1.466                  | 0.986 | 1.464                   | 0.983 | 1.995                       | 1.667 | 2.033                      | 1.701 |
|                                   | 48   | 1.914     | 1.493 | 2.337   | 1.227 | 2.051 | 1.549 | 1.669                   | 1.134 | 1.663                  | 1.128 | 1.662                   | 1.128 | 2.158                       | 1.801 | 2.119                      | 1.765 |
|                                   | 60   | 2.118     | 1.659 | 2.075   | 0.991 | 1.914 | 1.493 | 1.594                   | 1.111 | 1.590                  | 1.110 | 1.589                   | 1.106 | 2.218                       | 1.859 | 2.195                      | 1.842 |
|                                   | Avg. | 1.780     | 1.366 | 2.011   | 1.077 | 1.881 | 1.492 | 1.570                   | 1.056 | 1.566                  | 1.054 | 1.566                   | 1.052 | 1.998                       | 1.675 | 1.978                      | 1.661 |
